# Supplementary material
Source: Springer Nature journal article supplement (https://www.springermedizin.de/resource/supplementary/12906_2008_209_MOESM3_ESM.pdf/9524282)
Supplement: MOESM3 [file 9524282]

**Table 1.** Demographic Characteristics of Study Participants

| <b>Subject #</b> | <b>Race</b> | <b>Age<br/>(years)</b> | <b>BMI<br/>(kg/m<sup>2</sup>)</b> | <b>Fat (%)</b> |
|------------------|-------------|------------------------|-----------------------------------|----------------|
| 1                | AA          | 41                     | 29.9                              | 29.5           |
| 2                | AA          | 43                     | 22.4                              | 12.2           |
| 3                | AA          | 41                     | 22.3                              | 12.6           |
| 4                | AA          | 53                     | 26.6                              | 23.0           |
| 5                | W           | 26                     | 29.0                              | 25.2           |
| 6                | AA          | 49                     | 29.9                              | 32.1           |
| 7                | AA          | 43                     | 24.7                              | 22.3           |
| 8                | AA          | 44                     | 21.9                              | 21.1           |
| 9                | AA          | 36                     | 29.1                              | 29.9           |
| 10               | AA          | 37                     | 24.0                              | 24.7           |
| 11               | AA          | 52                     | 23.4                              | 15.8           |
| 12               | AA          | 42                     | 29.3                              | 19.7           |
| 13               | AA          | 46                     | 26.7                              | 26.7           |
| 14               | W           | 49                     | 26.5                              | 26.1           |

AA- African-American; W-White
